# Supplementary material
Source: publisher figshare collection journal article supplement (https://acs.figshare.com/ndownloader/files/3736300)
Supplement: Supplementary file 1 [file 3736300]

 
data_ic16940 
  
_audit_creation_method            SHELXL-97 
_chemical_name_systematic 
; 
 ? 
; 
_chemical_name_common             ? 
_chemical_melting_point           ? 
_chemical_formula_moiety          ? 
_chemical_formula_sum 
 'C25 H28 N4 O5' 
_chemical_formula_weight          464.51 
_chemical_absolute_configuration  'ad'  

loop_ 
 _atom_type_symbol 
 _atom_type_description 
 _atom_type_scat_dispersion_real 
 _atom_type_scat_dispersion_imag 
 _atom_type_scat_source 
 'C'  'C'   0.0033   0.0016 
 'International Tables Vol C Tables 4.2.6.8 and 6.1.1.4' 
 'H'  'H'   0.0000   0.0000 
 'International Tables Vol C Tables 4.2.6.8 and 6.1.1.4' 
 'N'  'N'   0.0061   0.0033 
 'International Tables Vol C Tables 4.2.6.8 and 6.1.1.4' 
 'O'  'O'   0.0106   0.0060 
 'International Tables Vol C Tables 4.2.6.8 and 6.1.1.4' 
  
_symmetry_cell_setting            Orthorhombic 
_symmetry_space_group_name_H-M    P2(1)2(1)2(1) 
  
loop_ 
 _symmetry_equiv_pos_as_xyz 
 'x, y, z' 
 '-x+1/2, -y, z+1/2' 
 '-x, y+1/2, -z+1/2' 
 'x+1/2, -y+1/2, -z' 
  
_cell_length_a                    8.2785(2) 
_cell_length_b                    9.2956(2) 
_cell_length_c                    29.7576(7) 
_cell_angle_alpha                 90.00 
_cell_angle_beta                  90.00 
_cell_angle_gamma                 90.00 
_cell_volume                      2289.96(9) 
_cell_formula_units_Z             4 
_cell_measurement_temperature     200(2) 
_cell_measurement_reflns_used     12020 
_cell_measurement_theta_min       1.37 
_cell_measurement_theta_max       25.00 
  
_exptl_crystal_description        needle 
_exptl_crystal_colour             colorless 
_exptl_crystal_size_max           0.40 
_exptl_crystal_size_mid           0.05 
_exptl_crystal_size_min           0.05 
_exptl_crystal_density_meas       ? 
_exptl_crystal_density_diffrn     1.347 
_exptl_crystal_density_method     'not measured' 
_exptl_crystal_F_000              984 
_exptl_absorpt_coefficient_mu     0.095 
_exptl_absorpt_correction_type    multi-scan 
_exptl_absorpt_correction_T_min   0.9629 
_exptl_absorpt_correction_T_max   0.9952 
_exptl_absorpt_process_details    'SORTAV (Blessing, 1995)' 
  
_exptl_special_details 
; 
 ? 
; 
  
_diffrn_ambient_temperature       200(2) 
_diffrn_radiation_wavelength      0.71073 
_diffrn_radiation_type            MoK\a 
_diffrn_radiation_source          'fine-focus sealed tube' 
_diffrn_radiation_monochromator   graphite 
_diffrn_measurement_device_type   'NONIUS KappaCCD' 
_diffrn_measurement_method        '\w scans' 
_diffrn_detector_area_resol_mean  ? 
_diffrn_reflns_number             12020 
_diffrn_reflns_av_R_equivalents   0.0592 
_diffrn_reflns_av_sigmaI/netI     0.0795 
_diffrn_reflns_limit_h_min        -9 
_diffrn_reflns_limit_h_max        9 
_diffrn_reflns_limit_k_min        -11 
_diffrn_reflns_limit_k_max        11 
_diffrn_reflns_limit_l_min        -35 
_diffrn_reflns_limit_l_max        35 
_diffrn_reflns_theta_min          1.37 
_diffrn_reflns_theta_max          25.00 
_reflns_number_total              4001 
_reflns_number_gt                 2536 
_reflns_threshold_expression      >2sigma(I) 
  
_computing_data_collection        'NONIUS COLLECT' 
_computing_cell_refinement        DENZO-SMN 
_computing_data_reduction         DENZO-SMN 
_computing_structure_solution     'SHELXS-97 (Sheldrick, 2008)' 
_computing_structure_refinement   'SHELXL-97 (Sheldrick, 2008)' 
_computing_molecular_graphics     'Bruker SHELXTL' 
_computing_publication_material   'Bruker SHELXTL' 
  
_refine_special_details 
; 
 Refinement of F^2^ against ALL reflections.  The weighted R-factor wR and 
 goodness of fit S are based on F^2^, conventional R-factors R are based 
 on F, with F set to zero for negative F^2^. The threshold expression of 
 F^2^ > 2sigma(F^2^) is used only for calculating R-factors(gt) etc. and is 
 not relevant to the choice of reflections for refinement.  R-factors based 
 on F^2^ are statistically about twice as large as those based on F, and R- 
 factors based on ALL data will be even larger. 
; 
  
_refine_ls_structure_factor_coef  Fsqd 
_refine_ls_matrix_type            full 
_refine_ls_weighting_scheme       calc 
_refine_ls_weighting_details 
 'calc w=1/[\s^2^(Fo^2^)+(0.0485P)^2^+0.0000P] where P=(Fo^2^+2Fc^2^)/3' 
_atom_sites_solution_primary      direct 
_atom_sites_solution_secondary    difmap 
_atom_sites_solution_hydrogens    geom 
_refine_ls_hydrogen_treatment     mixed 
_refine_ls_extinction_method      none 
_refine_ls_extinction_coef        ? 
_refine_ls_abs_structure_details 
 'Flack H D (1983), Acta Cryst. A39, 876-881' 
_refine_ls_abs_structure_Flack    -1.8(15) 
_refine_ls_number_reflns          4001 
_refine_ls_number_parameters      314 
_refine_ls_number_restraints      0 
_refine_ls_R_factor_all           0.0909 
_refine_ls_R_factor_gt            0.0400 
_refine_ls_wR_factor_ref          0.1047 
_refine_ls_wR_factor_gt           0.0785 
_refine_ls_goodness_of_fit_ref    1.002 
_refine_ls_restrained_S_all       1.002 
_refine_ls_shift/su_max           0.008 
_refine_ls_shift/su_mean          0.000 
  
loop_ 
 _atom_site_label 
 _atom_site_type_symbol 
 _atom_site_fract_x 
 _atom_site_fract_y 
 _atom_site_fract_z 
 _atom_site_U_iso_or_equiv 
 _atom_site_adp_type 
 _atom_site_occupancy 
 _atom_site_symmetry_multiplicity 
 _atom_site_calc_flag 
 _atom_site_refinement_flags 
 _atom_site_disorder_assembly 
 _atom_site_disorder_group 
O1 O 1.5107(2) -0.1140(2) 0.16979(7) 0.0469(6) Uani 1 1 d . . . 
O2 O 0.7761(3) 0.1410(3) -0.02545(9) 0.0854(9) Uani 1 1 d . . . 
O3 O 0.7011(3) -0.0354(3) 0.01679(9) 0.0714(8) Uani 1 1 d . . . 
O4 O 0.5605(3) 0.5474(2) 0.11339(7) 0.0552(7) Uani 1 1 d . . . 
O5 O 0.8314(3) 0.7960(3) 0.13782(10) 0.0656(8) Uani 1 1 d . . . 
H5A H 0.861(5) 0.714(4) 0.1341(14) 0.098 Uiso 1 1 d . . . 
H5B H 0.730(5) 0.790(5) 0.1368(14) 0.098 Uiso 1 1 d . . . 
N1 N 1.2614(3) -0.0151(2) 0.16975(8) 0.0316(6) Uani 1 1 d . . . 
N2 N 1.0526(3) 0.3363(2) 0.15751(7) 0.0331(6) Uani 1 1 d . . . 
H2 H 0.9880 0.3414 0.1341 0.040 Uiso 1 1 calc R . . 
N3 N 1.0191(3) 0.5775(3) 0.18428(8) 0.0370(6) Uani 1 1 d . . . 
N4 N 0.8008(4) 0.0512(4) 0.00380(10) 0.0528(8) Uani 1 1 d . . . 
C1 C 1.3934(4) -0.0671(3) 0.14831(10) 0.0358(8) Uani 1 1 d . . . 
C2 C 1.3881(3) -0.0721(3) 0.09834(9) 0.0370(8) Uani 1 1 d . . . 
H2A H 1.4461 -0.1589 0.0878 0.044 Uiso 1 1 calc R . . 
H2B H 1.4445 0.0132 0.0861 0.044 Uiso 1 1 calc R . . 
C3 C 1.2168(3) -0.0752(3) 0.08071(9) 0.0320(7) Uani 1 1 d . . . 
H3 H 1.1598 -0.1594 0.0943 0.038 Uiso 1 1 calc R . . 
C4 C 1.2182(4) -0.0940(3) 0.03011(9) 0.0410(8) Uani 1 1 d . . . 
H4A H 1.2804 -0.0146 0.0163 0.049 Uiso 1 1 calc R . . 
H4B H 1.2728 -0.1856 0.0225 0.049 Uiso 1 1 calc R . . 
C5 C 1.0485(4) -0.0951(3) 0.01104(10) 0.0413(8) Uani 1 1 d . . . 
H5C H 1.0521 -0.1046 -0.0221 0.050 Uiso 1 1 calc R . . 
H5D H 0.9867 -0.1772 0.0234 0.050 Uiso 1 1 calc R . . 
C6 C 0.9688(3) 0.0456(3) 0.02410(9) 0.0371(8) Uani 1 1 d . . . 
H6 H 1.0341 0.1269 0.0117 0.045 Uiso 1 1 calc R . . 
C7 C 0.9552(3) 0.0636(3) 0.07564(9) 0.0313(7) Uani 1 1 d . . . 
H7 H 0.8982 -0.0232 0.0876 0.038 Uiso 1 1 calc R . . 
C8 C 1.1296(3) 0.0632(3) 0.09566(8) 0.0297(7) Uani 1 1 d . . . 
H8 H 1.1900 0.1483 0.0838 0.036 Uiso 1 1 calc R . . 
C9 C 1.1286(3) 0.0697(3) 0.14817(8) 0.0289(7) Uani 1 1 d . . . 
H9 H 1.0244 0.0262 0.1583 0.035 Uiso 1 1 calc R . . 
C10 C 1.1409(3) 0.2166(3) 0.17020(9) 0.0300(7) Uani 1 1 d . . . 
C11 C 1.2280(3) 0.2489(3) 0.20850(9) 0.0306(7) Uani 1 1 d . . . 
C12 C 1.3230(4) 0.1398(3) 0.23403(9) 0.0372(8) Uani 1 1 d . . . 
H12A H 1.3062 0.1523 0.2667 0.045 Uiso 1 1 calc R . . 
H12B H 1.4397 0.1504 0.2275 0.045 Uiso 1 1 calc R . . 
C13 C 1.2637(4) -0.0073(3) 0.21909(9) 0.0357(8) Uani 1 1 d . . . 
H13A H 1.3359 -0.0829 0.2312 0.043 Uiso 1 1 calc R . . 
H13B H 1.1536 -0.0243 0.2310 0.043 Uiso 1 1 calc R . . 
C14 C 1.0820(3) 0.4454(3) 0.18727(9) 0.0294(7) Uani 1 1 d . . . 
C15 C 1.1917(3) 0.3953(3) 0.21976(9) 0.0301(7) Uani 1 1 d . . . 
C16 C 1.2351(4) 0.4904(3) 0.25401(10) 0.0361(8) Uani 1 1 d . . . 
H16 H 1.3061 0.4624 0.2775 0.043 Uiso 1 1 calc R . . 
C17 C 1.1700(4) 0.6272(3) 0.25210(10) 0.0382(8) Uani 1 1 d . . . 
H17 H 1.1963 0.6956 0.2747 0.046 Uiso 1 1 calc R . . 
C18 C 1.0663(4) 0.6651(3) 0.21735(11) 0.0384(8) Uani 1 1 d . . . 
H18 H 1.0259 0.7608 0.2171 0.046 Uiso 1 1 calc R . . 
C19 C 0.8518(3) 0.1927(3) 0.08634(9) 0.0309(7) Uani 1 1 d . . . 
C20 C 0.7234(4) 0.1802(3) 0.11618(9) 0.0358(8) Uani 1 1 d . . . 
H20 H 0.7037 0.0900 0.1302 0.043 Uiso 1 1 calc R . . 
C21 C 0.6237(4) 0.2949(3) 0.12605(10) 0.0405(8) Uani 1 1 d . . . 
H21 H 0.5358 0.2827 0.1462 0.049 Uiso 1 1 calc R . . 
C22 C 0.6516(4) 0.4274(3) 0.10659(10) 0.0394(8) Uani 1 1 d . . . 
C23 C 0.7812(4) 0.4436(3) 0.07744(9) 0.0364(8) Uani 1 1 d . . . 
H23 H 0.8038 0.5354 0.0648 0.044 Uiso 1 1 calc R . . 
C24 C 0.8773(3) 0.3279(3) 0.06669(9) 0.0328(7) Uani 1 1 d . . . 
H24 H 0.9623 0.3398 0.0456 0.039 Uiso 1 1 calc R . . 
C25 C 0.4217(5) 0.5332(4) 0.14144(14) 0.0804(14) Uani 1 1 d . . . 
H25A H 0.3512 0.4577 0.1295 0.121 Uiso 1 1 calc R . . 
H25B H 0.3628 0.6247 0.1421 0.121 Uiso 1 1 calc R . . 
H25C H 0.4556 0.5077 0.1720 0.121 Uiso 1 1 calc R . . 
  
loop_ 
 _atom_site_aniso_label 
 _atom_site_aniso_U_11 
 _atom_site_aniso_U_22 
 _atom_site_aniso_U_33 
 _atom_site_aniso_U_23 
 _atom_site_aniso_U_13 
 _atom_site_aniso_U_12 
O1 0.0394(14) 0.0518(14) 0.0495(13) -0.0071(11) -0.0128(12) 0.0124(12) 
O2 0.077(2) 0.108(2) 0.0706(17) 0.0216(17) -0.0328(16) 0.0151(18) 
O3 0.0425(16) 0.098(2) 0.0741(18) -0.0092(16) -0.0102(14) -0.0183(16) 
O4 0.0493(14) 0.0427(14) 0.0734(16) 0.0026(12) 0.0284(13) 0.0043(13) 
O5 0.0515(16) 0.0512(16) 0.0941(19) 0.0219(16) -0.0017(16) 0.0001(15) 
N1 0.0355(15) 0.0295(14) 0.0300(13) -0.0004(11) -0.0043(13) 0.0021(12) 
N2 0.0349(14) 0.0312(15) 0.0333(14) -0.0006(12) -0.0083(12) 0.0030(13) 
N3 0.0379(16) 0.0321(16) 0.0411(16) -0.0036(13) -0.0013(12) -0.0010(14) 
N4 0.044(2) 0.071(2) 0.0437(18) -0.0105(17) -0.0128(16) 0.0064(19) 
C1 0.0335(19) 0.0311(18) 0.043(2) -0.0056(16) -0.0055(17) 0.0015(17) 
C2 0.0333(18) 0.0377(19) 0.0402(19) -0.0050(15) -0.0021(14) 0.0044(16) 
C3 0.0279(17) 0.0328(18) 0.0351(16) -0.0042(14) -0.0023(14) 0.0011(15) 
C4 0.0372(19) 0.050(2) 0.0354(17) -0.0087(16) -0.0030(15) 0.0043(17) 
C5 0.0419(19) 0.044(2) 0.0376(19) -0.0105(16) -0.0045(16) 0.0018(17) 
C6 0.0280(18) 0.048(2) 0.0358(18) -0.0019(15) -0.0032(15) -0.0019(17) 
C7 0.0316(17) 0.0317(17) 0.0306(17) 0.0007(14) -0.0039(14) -0.0032(16) 
C8 0.0291(16) 0.0307(17) 0.0293(16) 0.0022(14) 0.0008(14) -0.0023(16) 
C9 0.0266(16) 0.0273(16) 0.0328(17) -0.0008(14) -0.0038(14) 0.0019(15) 
C10 0.0295(17) 0.0280(17) 0.0325(17) 0.0009(14) -0.0011(15) -0.0014(15) 
C11 0.0319(18) 0.0287(17) 0.0311(16) 0.0023(13) 0.0012(15) 0.0000(15) 
C12 0.0415(19) 0.0355(19) 0.0346(17) 0.0011(14) -0.0058(15) 0.0046(17) 
C13 0.0393(19) 0.0343(18) 0.0336(17) 0.0059(14) -0.0036(16) 0.0042(16) 
C14 0.0284(18) 0.0276(17) 0.0321(17) -0.0006(15) 0.0015(14) -0.0017(16) 
C15 0.0293(18) 0.0294(18) 0.0316(16) 0.0000(14) 0.0016(15) -0.0037(15) 
C16 0.0350(19) 0.0370(19) 0.0363(18) 0.0032(15) -0.0019(16) -0.0055(16) 
C17 0.041(2) 0.0348(19) 0.0391(19) -0.0070(16) -0.0003(17) -0.0052(16) 
C18 0.039(2) 0.0302(18) 0.0463(19) -0.0017(16) 0.0052(17) 0.0035(17) 
C19 0.0252(17) 0.0357(19) 0.0319(16) 0.0025(15) -0.0052(14) -0.0012(16) 
C20 0.0328(18) 0.0352(19) 0.0393(18) -0.0002(15) -0.0009(16) -0.0040(17) 
C21 0.0328(19) 0.045(2) 0.0436(19) -0.0002(17) 0.0083(16) -0.0017(18) 
C22 0.041(2) 0.0321(19) 0.0451(19) -0.0039(16) 0.0022(17) 0.0007(18) 
C23 0.0368(19) 0.0377(19) 0.0348(17) 0.0033(15) 0.0036(16) -0.0045(18) 
C24 0.0285(17) 0.041(2) 0.0289(16) 0.0047(15) 0.0006(14) -0.0021(17) 
C25 0.069(3) 0.050(2) 0.122(4) -0.008(2) 0.057(3) 0.005(2) 
  
_geom_special_details 
; 
 All esds (except the esd in the dihedral angle between two l.s. planes) 
 are estimated using the full covariance matrix.  The cell esds are taken 
 into account individually in the estimation of esds in distances, angles 
 and torsion angles; correlations between esds in cell parameters are only 
 used when they are defined by crystal symmetry.  An approximate (isotropic) 
 treatment of cell esds is used for estimating esds involving l.s. planes. 
; 
  
loop_ 
 _geom_bond_atom_site_label_1 
 _geom_bond_atom_site_label_2 
 _geom_bond_distance 
 _geom_bond_site_symmetry_2 
 _geom_bond_publ_flag 
O1 C1 1.241(3) . ? 
O2 N4 1.224(3) . ? 
O3 N4 1.215(3) . ? 
O4 C22 1.361(4) . ? 
O4 C25 1.427(4) . ? 
N1 C1 1.355(3) . ? 
N1 C13 1.470(3) . ? 
N1 C9 1.497(3) . ? 
N2 C14 1.368(3) . ? 
N2 C10 1.384(3) . ? 
N3 C18 1.336(4) . ? 
N3 C14 1.336(3) . ? 
N4 C6 1.517(4) . ? 
C1 C2 1.488(4) . ? 
C2 C3 1.513(4) . ? 
C3 C4 1.516(4) . ? 
C3 C8 1.541(4) . ? 
C4 C5 1.516(4) . ? 
C5 C6 1.515(4) . ? 
C6 C7 1.547(4) . ? 
C7 C19 1.508(4) . ? 
C7 C8 1.562(4) . ? 
C8 C9 1.564(3) . ? 
C9 C10 1.517(4) . ? 
C10 C11 1.382(4) . ? 
C11 C15 1.433(4) . ? 
C11 C12 1.491(4) . ? 
C12 C13 1.520(4) . ? 
C14 C15 1.406(4) . ? 
C15 C16 1.396(4) . ? 
C16 C17 1.382(4) . ? 
C17 C18 1.390(4) . ? 
C19 C20 1.390(4) . ? 
C19 C24 1.402(4) . ? 
C20 C21 1.380(4) . ? 
C21 C22 1.380(4) . ? 
C22 C23 1.388(4) . ? 
C23 C24 1.376(4) . ? 
  
loop_ 
 _geom_angle_atom_site_label_1 
 _geom_angle_atom_site_label_2 
 _geom_angle_atom_site_label_3 
 _geom_angle 
 _geom_angle_site_symmetry_1 
 _geom_angle_site_symmetry_3 
 _geom_angle_publ_flag 
C22 O4 C25 117.2(2) . . ? 
C1 N1 C13 118.5(2) . . ? 
C1 N1 C9 125.3(2) . . ? 
C13 N1 C9 114.3(2) . . ? 
C14 N2 C10 109.0(2) . . ? 
C18 N3 C14 113.4(2) . . ? 
O3 N4 O2 124.4(3) . . ? 
O3 N4 C6 118.2(3) . . ? 
O2 N4 C6 117.4(3) . . ? 
O1 C1 N1 120.9(3) . . ? 
O1 C1 C2 121.8(3) . . ? 
N1 C1 C2 117.2(3) . . ? 
C1 C2 C3 112.0(2) . . ? 
C2 C3 C4 109.8(2) . . ? 
C2 C3 C8 108.9(2) . . ? 
C4 C3 C8 112.8(2) . . ? 
C5 C4 C3 111.4(2) . . ? 
C6 C5 C4 107.6(2) . . ? 
C5 C6 N4 109.1(2) . . ? 
C5 C6 C7 112.3(2) . . ? 
N4 C6 C7 108.9(2) . . ? 
C19 C7 C6 109.7(2) . . ? 
C19 C7 C8 116.5(2) . . ? 
C6 C7 C8 108.1(2) . . ? 
C3 C8 C7 108.9(2) . . ? 
C3 C8 C9 108.9(2) . . ? 
C7 C8 C9 112.1(2) . . ? 
N1 C9 C10 103.8(2) . . ? 
N1 C9 C8 113.8(2) . . ? 
C10 C9 C8 117.8(2) . . ? 
C11 C10 N2 109.0(2) . . ? 
C11 C10 C9 125.9(2) . . ? 
N2 C10 C9 124.8(2) . . ? 
C10 C11 C15 106.8(2) . . ? 
C10 C11 C12 123.2(3) . . ? 
C15 C11 C12 129.6(3) . . ? 
C11 C12 C13 107.0(2) . . ? 
N1 C13 C12 109.9(2) . . ? 
N3 C14 N2 124.7(3) . . ? 
N3 C14 C15 127.0(3) . . ? 
N2 C14 C15 108.3(2) . . ? 
C16 C15 C14 117.3(3) . . ? 
C16 C15 C11 135.9(3) . . ? 
C14 C15 C11 106.8(2) . . ? 
C17 C16 C15 116.9(3) . . ? 
C16 C17 C18 120.3(3) . . ? 
N3 C18 C17 125.0(3) . . ? 
C20 C19 C24 117.2(3) . . ? 
C20 C19 C7 120.1(3) . . ? 
C24 C19 C7 122.7(3) . . ? 
C21 C20 C19 121.9(3) . . ? 
C20 C21 C22 120.0(3) . . ? 
O4 C22 C21 125.2(3) . . ? 
O4 C22 C23 115.6(3) . . ? 
C21 C22 C23 119.2(3) . . ? 
C24 C23 C22 120.5(3) . . ? 
C23 C24 C19 121.1(3) . . ? 
  
loop_ 
 _geom_hbond_atom_site_label_D 
 _geom_hbond_atom_site_label_H 
 _geom_hbond_atom_site_label_A 
 _geom_hbond_distance_DH 
 _geom_hbond_distance_HA 
 _geom_hbond_distance_DA 
 _geom_hbond_angle_DHA 
 _geom_hbond_site_symmetry_A 
O5 H5B O1  0.84(4) 2.25(4) 2.942(3) 140(4) 1_465 
O5 H5A N3  0.80(4) 2.36(4) 2.907(3) 126(4) . 
  
_diffrn_measured_fraction_theta_max    0.998 
_diffrn_reflns_theta_full              25.00 
_diffrn_measured_fraction_theta_full   0.998 
_refine_diff_density_max    0.164 
_refine_diff_density_min   -0.181 
_refine_diff_density_rms    0.043 
